# Supplementary material for: Exploring the influence of inhaled liposome membrane fluidity on its interaction with pulmonary physiological barriers
Source: Royal Society of Chemistry journal article supplement (doi:10.1039/d0bm01529f), 2020-01-01
Supplement: d0bm01529f1.pdf [file d0bm01529f1.pdf]

## Supplementary materials

Table S1. The physiochemical characteristics of the C-6-loaded liposomes.

| Formulations | Size (nm)   | PDI         | Zeta potential (mV) | C-6 release at 37 °C within 24 h <sup>a</sup> (%) |
|--------------|-------------|-------------|---------------------|---------------------------------------------------|
| DC80:0       | 101.5 ± 0.5 | 0.28 ± 0.01 | -4.01 ± 0.02        | 0.73 ± 0.61                                       |
| DC80:10      | 112.7 ± 0.4 | 0.33 ± 0.01 | -3.93 ± 0.37        | 1.13 ± 0.10                                       |
| DC80:20      | 108.7 ± 0.9 | 0.27 ± 0.01 | -3.40 ± 0.37        | 0.04 ± 0.07                                       |
| DC80:40      | 111.6 ± 1.0 | 0.38 ± 0.01 | -1.54 ± 0.14        | 0.36 ± 0.22                                       |

<sup>a</sup> C-6 cumulated release in PBS (10 mM, pH 7.40) at 37 °C within 24 h.

Table S2. The physiochemical characteristics of the DiR-loaded liposomes.

| Formulations | Size (nm)   | PDI           | Zeta potential (mV) | DiR release at 37 °C within 48h <sup>a</sup> (%) |
|--------------|-------------|---------------|---------------------|--------------------------------------------------|
| DC80:0       | 117.8 ± 3.7 | 0.30 ± 0.01   | -4.14 ± 0.25        | 1.81 ± 0.85                                      |
| DC80:10      | 110.1 ± 2.4 | 0.288 ± 0.010 | -3.72 ± 0.11        | 2.23 ± 1.18                                      |
| DC80:20      | 117.1 ± 1.5 | 0.307 ± 0.044 | -4.20 ± 0.26        | 1.80 ± 0.77                                      |
| DC80:40      | 107.9 ± 0.8 | 0.338 ± 0.041 | -1.82 ± 0.14        | 2.55 ± 1.58                                      |

<sup>a</sup> DiR cumulated release in 0.1% (w/v) tween-80 PBS (10 mM, pH 7.40) at 37 °C within 48 h.

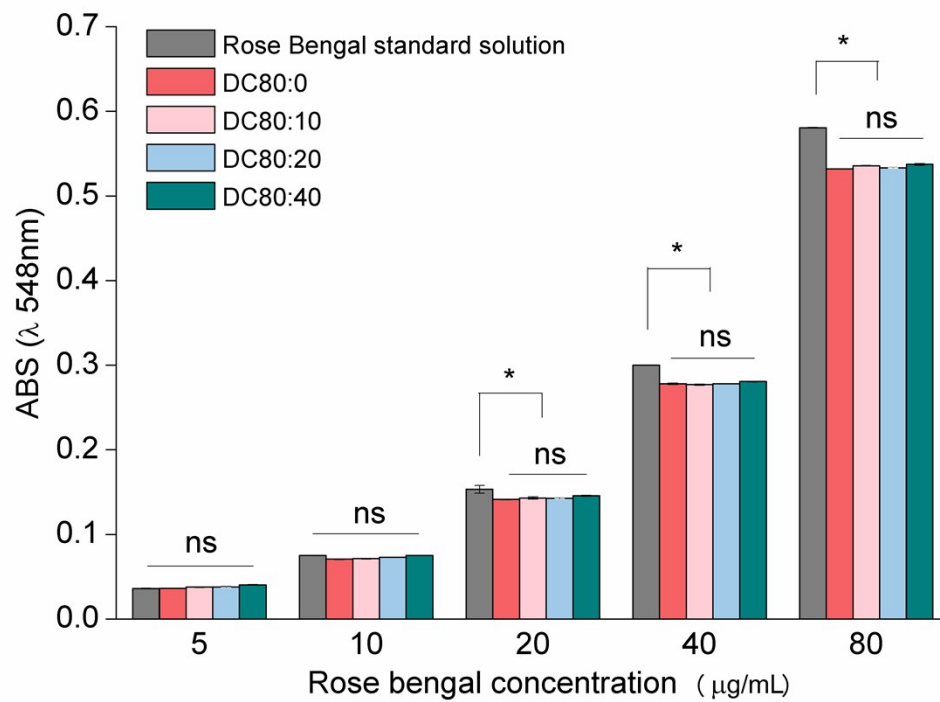

Figure S1. Absorption at 548 nm of the Rose Bengal supernatant after incubating with the liposomes for 3 h. (ns: not significant, \*:  $p < 0.05$ ).

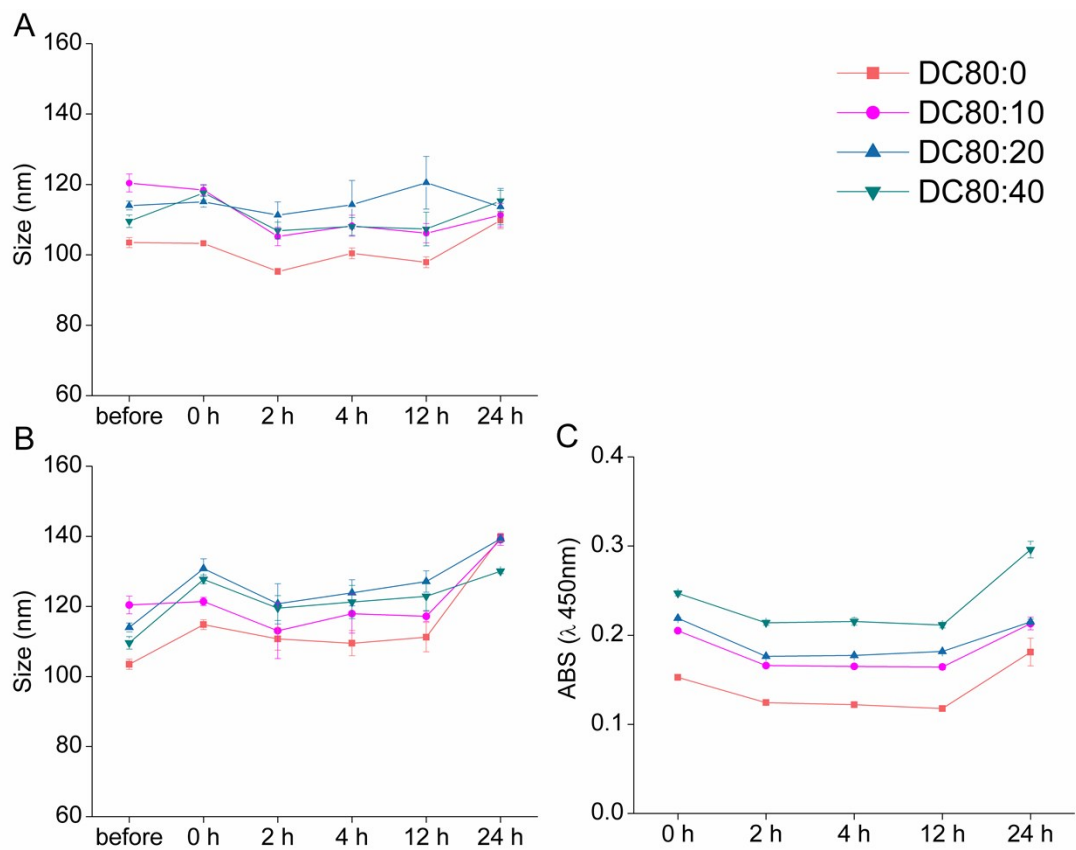

Figure S2. Stability of the C-6 loaded liposomes. (A) The size of the liposomes when incubated in PBS (10 mM; pH7.4) at 37 °C during 24h. (B) The size of the liposomes when incubated in mucin saturated solution at 37 °C during 24h. (C) The absorption of the liposomes when incubated in mucin saturated solution at 37 °C during 24h.
